# Supplementary material for: Can the use of magnetized water affect the seedling development and the metabolite profiles of two different species: Lentil and durum wheat?
Source: Front Plant Sci. 2023 Feb 14;13:1066088. doi: 10.3389/fpls.2022.1066088 (PMC9971934; doi:10.3389/fpls.2022.1066088)
Supplement: Supplementary file 2 [file Table_2.xlsx]

## Sheet:  Supp Table 2
	Supplementary Table 2. Two-way ANOVA for the metabolites of durum wheat
	Metabolites	Seeds						Roots							Epicotyls
		Timing		Treatment		Timing*Treatment		Timing			Treatment		Timing*Treatment		Timing			Treatment		Timing*Treatment
		F Ratio	Prob > F	F Ratio	Prob > F	F Ratio	Prob > F	F Ratio		Prob > F	F Ratio	Prob > F	F Ratio	Prob > F	F Ratio		Prob > F	F Ratio	Prob > F	F Ratio	Prob > F
	valine	38,286	<,0001*	0,763	0,3911	0,763	0,4773	22,325		<,0001*	39,939	<,0001*	23,051	<,0001*	−		−	−	−	−	−
	alanine	38,286	<,0001*	0,763	0,3911	0,763	0,4773	262,274		<,0001*	0,000	0,9847	0,083	0,9210	−		−	−	−	−	−
	norvaline	4,269	0,0259*	0,023	0,8803	0,174	0,8411	75,479		<,0001*	0,747	0,3961	0,747	0,4844	−		−	−	−	−	−
	oxalic acid	1010,498	<,0001*	302,522	<,0001*	285,535	<,0001*	1,071		0,3585	1,074	0,3104	0,421	0,6614	9,438		0,0073*	9,438	0,0073*	9,438	0,0073*
	isoleucine	52,398	<,0001*	1,384	0,2509	1,384	0,2698	56,322		<,0001*	7,184	0,0131*	2,680	0,0890	−		−	−	−	−	−
	proline	27,487	<,0001*	1,221	0,2801	1,221	0,3125	23,554		<,0001*	0,960	0,3370	0,960	0,3971	−		−	−	−	−	−
	serine	−	−	−	−	−	−	803,228		<,0001*	0,953	0,3388	2,725	0,0858	−		−	−	−	−	−
	threonine	−	−	−	−	−	−	19,894		<,0001*	0,091	0,7651	0,091	0,9130	−		−	−	−	−	−
	glycerol	70,432	<,0001*	0,812	0,3764	0,726	0,4940	66,562		<,0001*	1,112	0,3022	0,463	0,6352	16,206		0,0010*	0,083	0,7765	0,340	0,5679
	phosphate	65,055	<,0001*	0,126	0,7257	1,046	0,3669	57,656		<,0001*	4,541	0,0435*	1,572	0,2283	70,526		<,0001*	14,537	0,0015*	17,463	0,0007*
	maleic acid	78,394	<,0001*	0,000	0,9841	0,000	0,9996	−		−	−	−	−	−	−		−	−	−	−	−
	succinic acid	−	−	−	−	−	−	12,517		0,0002*	10,840	0,0031*	3,060	0,0655	−		−	−	−	−	−
	fumaric acid	637,975	<,0001*	135,712	<,0001*	166,374	<,0001*	20,512		<,0001*	4,010	0,0567	1,414	0,2627	−		−	−	−	−	−
	malic acid	10,552	0,0005*	0,034	0,8549	0,085	0,9188	95,149		<,0001*	15,606	0,0006*	0,782	0,4690	54,289		<,0001*	3,283	0,0888	3,283	0,0888
	t-cinnamic acid	220,328	<,0001*	0,458	0,5051	0,306	0,7395	−		−	−	−	−	−	−		−	−	−	−	−
	glutamic acid	−	−	−	−	−	−	548,945		<,0001*	0,194	0,6638	0,501	0,6124	−		−	−	−	−	−
	xylose	55,015	<,0001*	0,378	0,5443	0,288	0,7523	41,680		<,0001*	4,562	0,0431*	3,884	0,0346*	−		−	−	−	−	−
	lyxose	62,293	<,0001*	0,496	0,4882	0,411	0,6676	108,097		<,0001*	13,344	0,0013*	4,771	0,0180*	−		−	−	−	−	−
	threalose	44,556	<,0001*	0,216	0,6460	0,253	0,7785	94,643		<,0001*	9,541	0,0050*	3,893	0,0343*	−		−	−	−	−	−
	ribose	15,370	<,0001*	1,562	0,2234	1,332	0,2827	94,716		<,0001*	16,159	0,0005*	7,032	0,0039*	−		−	−	−	−	−
	putrescine	49,270	<,0001*	0,234	0,6329	0,151	0,8605	9,931		0,0007*	1,242	0,2761	1,242	0,3066	−		−	−	−	−	−
	shikimic acid	8354,441	<,0001*	0,734	0,4001	0,196	0,8230	68,354		<,0001*	15,058	0,0007*	1,556	0,2316	6,574		0,0208*	0,947	0,3449	8,529	0,0100*
	glutamine	79,345	<,0001*	0,238	0,6301	0,238	0,7901	−		−	−	−	−	−	−		−	−	−	−	−
	quinic acid	4073,281	<,0001*	0,876	0,3587	1,323	0,2850	70,249		<,0001*	1,982	0,1720	1,982	0,1597	16,806		0,0008*	2,055	0,1710	4,488	0,0501
	fructose	49,873	<,0001*	0,035	0,8540	0,159	0,8543	67,210		<,0001*	8,645	0,0071*	0,898	0,4208	31,158		<,0001*	12,709	0,0026*	0,815	0,3800
	mannose	105,945	<,0001*	1,668	0,2088	0,777	0,4709	175,414		<,0001*	0,944	0,3410	0,929	0,4086	3,418		0,0831	27,948	<,0001*	63,823	<,0001*
	galactose	240,446	<,0001*	0,911	0,3494	1,052	0,3648	24,793		<,0001*	2,294	0,1429	0,655	0,5284	16,880		0,0008*	1,013	0,3291	0,680	0,4217
	glucose	244,931	<,0001*	0,013	0,9103	0,085	0,9185	366,980		<,0001*	1,188	0,2866	3,088	0,0641	4,601		0,0476*	0,611	0,4458	1,100	0,3098
	mannitol	61,786	<,0001*	0,262	0,6132	0,100	0,9049	86,862		<,0001*	1,054	0,3148	0,239	0,7894	0,422		0,5250	6,775	0,0192*	12,745	0,0026*
	sorbitol	62,468	<,0001*	2,244	0,1471	2,644	0,0917	46,701		<,0001*	5,797	0,0241*	0,991	0,3859	0,273		0,6084	2,579	0,1279	0,063	0,8048
	galacturonic acid	69,796	<,0001*	0,945	0,3407	0,838	0,4449	67,266		<,0001*	10,360	0,0037*	7,356	0,0032*	35,540		<,0001*	0,114	0,7399	5,145	0,0375*
	myo-inositol	80,151	<,0001*	0,666	0,4224	0,907	0,4170	7,008		0,0040*	12,256	0,0018*	0,278	0,7600	16,301		0,0010*	0,268	0,6117	5,230	0,0362*
	sucrose	493,106	<,0001*	0,203	0,6560	5,941	0,0080*	45,174		<,0001*	19,679	0,0002*	7,896	0,0023*	1,120		0,3057	2,727	0,1182	6,915	0,0182*
	lactulose	385,786	<,0001*	0,160	0,6930	1,685	0,2067	67,207		<,0001*	0,013	0,9105	27,554	<,0001*	13,357		0,0021*	0,336	0,5705	6,316	0,0231*
	maltose	998,332	<,0001*	0,440	0,5133	3,916	0,0337*	117,135		<,0001*	41,435	<,0001*	10,505	0,0005*	20,424		0,0003*	2,368	0,1434	4,136	0,0589
	turanose	763,012	<,0001*	0,408	0,5289	5,264	0,0127*	92,222		<,0001*	8,123	0,0088*	8,336	0,0018*	36,662		<,0001*	8,363	0,0106*	8,363	0,0106*
	beta-gentibiose	7,467	0,0030*	0,277	0,6032	0,484	0,6223	251,611		<,0001*	30,276	<,0001*	30,010	<,0001*	9,225		0,0078*	0,265	0,6135	1,943	0,1824
	maltitol	575,148	<,0001*	0,070	0,7930	0,247	0,7828	−		−	−	−	−	−	−		−	−	−	−	−
	isomaltose	169,493	<,0001*	0,369	0,5492	0,137	0,8723	202,386		<,0001*	0,871	0,3600	9,188	0,0011*	767,581		<,0001*	4,411	0,0519	23,474	0,0002*
	raffinose	18,653	<,0001*	4,234	0,0507	3,525	0,0455*	−		−	−	−	−	−	−		−	−	−	−	−
	decanoic acid	0,628	0,5421	0,374	0,5466	4,849	0,0170*	−		−	−	−	−	−	−		−	−	−	−	−
	octadecane	1,129	0,3398	0,015	0,9039	0,343	0,7128	−		−	−	−	−	−	−		−	−	−	−	−
	nonadecane	2,232	0,1291	0,047	0,8306	2,069	0,1482	−		−	−	−	−	−	−		−	−	−	−	−
	1-hexadecanol	4,044	0,0307*	2,413	0,1334	0,343	0,7128	−		−	−	−	−	−	−		−	−	−	−	−
	cis-9-hexadecenoic acid	4,563	0,0209*	0,079	0,7807	3,188	0,0592	10036,884		<,0001*	3,770	0,0640	1,822	0,1834	32,433		<,0001*	1,797	0,1988	3,213	0,0920
	hexadecanoic acid	32,856	<,0001*	0,130	0,7220	1,654	0,2123	25,563		<,0001*	2,036	0,1665	0,714	0,4999	21,849		0,0003*	0,003	0,9537	0,049	0,8269
	docosane	15,616	<,0001*	5,355	0,0295*	4,876	0,0167*	−		−	−	−	−	−	−		−	−	−	−	−
	cis,cis-9,12-octadecadienoic acid	40,192	<,0001*	3,058	0,0931	2,951	0,0715	10,266		0,0006*	0,056	0,8146	0,068	0,9346	0,133		0,7203	0,034	0,8557	0,580	0,4572
	cis-9-octadecenoic acid	10,014	0,0007*	3,605	0,0697	4,151	0,0283*	7,670		0,0027*	0,160	0,6925	0,427	0,6571	25,392		0,0001*	0,265	0,6140	0,296	0,5938
	cis,cis,cis-9,12,15-octadecatrienoic acid	25,295	<,0001*	2,731	0,1114	0,738	0,4884	10,249		0,0006*	0,304	0,5864	0,573	0,5714	24,915		<,0001*	1,318	0,2678	0,010	0,9235
	cis-13-docosenoic acid	4,038E+10	<,0001*	2,106	0,1597	2,106	0,1437	343,154		<,0001*	0,086	0,7717	0,828	0,4490	12,807		0,0025*	0,802	0,3838	1,325	0,2666
	1,3-dihydroxy-5-nonadecylbenzene	8,645	0,0015*	0,801	0,3796	3,763	0,0379*	−		−	−	−	−	−	−		−	−	−	−	−
	1,3-dihydroxy-5-eicosylbenzene	3,504	0,0462*	4,516	0,0441*	3,386	0,0506	−		−	−	−	−	−	−		−	−	−	−	−
	b-sitosterol	−	−	−	−	−	−	73,728		<,0001*	11,377	0,0025*	4,055	0,0304*	114,495		<,0001*	3,724	0,0716	11,104	0,0042*
	* significant at p<,0001

## Sheet: Supp Table 3
	Supplementary Table 3. Two-way ANOVA for the metabolites of lentil
	Metabolites	Seeds						Roots						Epicotyl
		Timing		Treatment		Timing*Treatment		Timing		Treatment		Timing*Treatment		Timing		Treatment		Timing*Treatment
		F Ratio	Prob > F	F Ratio	Prob > F	F Ratio	Prob > F	F Ratio	Prob > F	F Ratio	Prob > F	F Ratio	Prob > F	F Ratio	Prob > F	F Ratio	Prob > F	F Ratio	Prob > F
	valine	68,801	<,0001*	5,122	0,0310*	4,759	0,0160*	236,967	<,0001*	10,357	0,0031*	4,265	0,0234*	44,942	<,0001*	0,488	0,4927	1,970	0,1758
	oxalic acid	0,036	0,9651	1,555	0,2221	1,183	0,3201	−	−	−	−	−	−	55,486	<,0001*	0,668	0,4233	0,022	0,8830
	leucine	50,930	<,0001*	1,491	0,2315	1,635	0,2119	−	−	−	−	−	−	9,220	0,0065*	0,876	0,3605	0,086	0,7727
	isoleucine	65,563	<,0001*	2,136	0,1543	2,224	0,1257	−	−	−	−	−	−	24,066	<,0001*	1,439	0,2444	0,298	0,5912
	serine	15,014	<,0001*	0,046	0,8313	1,113	0,3418	105,758	<,0001*	4,303	0,0467*	2,829	0,0749	0,095	0,7607	7,557	0,0124*	0,084	0,7753
	glycerol	4,214	0,0244*	0,645	0,4283	0,193	0,8252	46,840	<,0001*	0,248	0,6221	0,035	0,9661	32,124	<,0001*	2,016	0,1711	0,592	0,4507
	phosphate	160,890	<,0001*	0,550	0,4641	0,870	0,4292	599,627	<,0001*	7,508	0,0102*	2,274	0,1204	23,429	<,0001*	2,913	0,1033	1,483	0,2375
	threonine	50,435	<,0001*	0,714	0,4048	3,595	0,0398*	223,836	<,0001*	8,806	0,0058*	4,529	0,0191*	23,299	<,0001*	8,883	0,0074*	0,474	0,4991
	succinic acid	6,059	0,0062*	7,114	0,0122*	1,526	0,2337	432,248	<,0001*	1,343	0,2557	1,343	0,2764	66,724	<,0001*	0,384	0,5427	0,583	0,4542
	glycine	1274,340	<,0001*	6,257	0,0181*	4,520	0,0192*	−	−	−	−	−	−	28,260	<,0001*	3,076	0,0948	1,216	0,2833
	malic acid	1,437	0,2535	0,207	0,6525	0,397	0,6761	191,662	<,0001*	4,582	0,0406*	3,562	0,0409*	24,105	<,0001*	0,126	0,7264	0,001	0,9714
	glutamic acid	24,965	<,0001*	46,933	<,0001*	7,235	0,0027*	241,878	<,0001*	13,243	0,0010*	10,157	0,0004*	1,825	0,1918	4,492	0,0468*	0,188	0,6696
	GABA	25,562	<,0001*	2,314	0,1387	2,314	0,1163	701,754	<,0001*	16,413	0,0003*	16,413	<,0001*	−	−	−	−	−	−
	phenyl alanine	−	−	−	−	−	−	104,753	<,0001*	15,873	0,0004*	15,873	<,0001*	−	−	−	−	−	−
	asparagine	−	−	−	−	−	−	119,936	<,0001*	0,130	0,7213	0,130	0,8789	−	−	−	−	−	−
	xylose	50,365	<,0001*	6,544	0,0158*	2,120	0,1377	103,869	<,0001*	0,536	0,4697	0,536	0,5904	66,490	<,0001*	0,037	0,8494	0,817	0,3769
	lyxose	127,716	<,0001*	1,655	0,2081	2,778	0,0782	−	−	−	−	−	−	8,080	0,0101*	2,914	0,1033	2,334	0,1422
	threalose	153,096	<,0001*	0,283	0,5988	0,283	0,7557	−	−	−	−	−	−	−	−	−	−	−	−
	ribose	10,868	0,0003*	6,389	0,0170*	6,084	0,0061*	1,650	0,2089	0,669	0,4198	2,287	0,1190	14,568	0,0011*	4,823	0,0400*	2,254	0,1489
	aconitic acid	30,215	<,0001*	1,441	0,2394	0,864	0,4317	524,943	<,0001*	0,672	0,4187	12,443	0,0001*	52,915	<,0001*	0,160	0,6937	1,399	0,2507
	putrescine	18,019	<,0001*	3,877	0,0582	2,726	0,0817	−	−	−	−	−	−	−	−	−	−	−	−
	shikimic acid	40,636	<,0001*	0,092	0,7634	0,941	0,4015	4,465	0,0201*	0,743	0,3955	0,264	0,7701	34,074	<,0001*	0,342	0,5654	0,414	0,5271
	glycerol phosphate	179,164	<,0001*	0,529	0,4727	0,529	0,5947	−	−	−	−	−	−	−	−	−	−	−	−
	isocitric acid	−	−	−	−	−	−	54,317	<,0001*	12,348	0,0014*	12,348	0,0001*	−	−	−	−	−	−
	citric acid	103,739	<,0001*	2,655	0,1137	2,655	0,0867	471,957	<,0001*	0,384	0,5404	0,240	0,7883	24,296	<,0001*	0,001	0,9783	0,576	0,4566
	cadaverine	387,989	<,0001*	0,761	0,3899	1,277	0,2937	76,680	<,0001*	4,365	0,0453*	4,127	0,0261*	14,820	0,0010*	2,417	0,1357	0,035	0,8533
	quinic acid	3,050	0,0622	0,178	0,6759	0,375	0,6902	5,236	0,0112*	0,439	0,5127	0,320	0,7283	27,627	<,0001*	0,322	0,5766	0,169	0,6850
	fructose	134,357	<,0001*	1,155	0,2910	1,483	0,2432	23,922	<,0001*	1,221	0,2780	1,109	0,3430	61,037	<,0001*	0,084	0,7754	0,148	0,7046
	mannose	245,283	<,0001*	3,410	0,0747	0,938	0,4024	28,098	<,0001*	0,003	0,9594	0,010	0,9897	27,501	<,0001*	0,574	0,4574	0,143	0,7089
	galactose	21,365	<,0001*	2,946	0,0964	0,659	0,5248	12,079	0,0001*	3,437	0,0736	3,509	0,0427*	7,394	0,0132*	0,925	0,3476	0,318	0,5788
	glucose	96,976	<,0001*	4,047	0,0533	0,326	0,7246	2,729	0,0815	2,291	0,1406	1,178	0,3219	2,836	0,1077	1,345	0,2597	2,458	0,1326
	mannitol	6,481	0,0046*	3,406	0,0748	2,295	0,1182	1,725	0,1954	0,361	0,5525	0,384	0,6843	199,034	<,0001*	227,614	<,0001*	214,214	<,0001*
	sorbitol	22,967	<,0001*	0,736	0,3976	5,685	0,0081*	51,638	<,0001*	0,691	0,4123	0,580	0,5661	1,275	0,2722	0,569	0,4596	0,022	0,8835
	gluconic acid	53,015	<,0001*	0,032	0,8584	0,032	0,9682	71,128	<,0001*	37,499	<,0001*	36,811	<,0001*	1,899	0,1834	1,400	0,2507	1,407	0,2494
	myo insitol	77,278	<,0001*	0,066	0,7996	1,103	0,3450	37,879	<,0001*	1,040	0,3160	0,653	0,5277	431,452	<,0001*	12,567	0,0020*	1,028	0,3228
	sucrose	199,911	<,0001*	6,136	0,0191*	0,183	0,8338	3,383	0,0473*	0,796	0,3795	1,655	0,2082	4,639	0,0436*	0,062	0,8053	0,256	0,6187
	lactulose	11,433	0,0002*	0,818	0,3729	1,327	0,2805	51,076	<,0001*	0,448	0,5084	0,412	0,6659	1,107	0,3054	0,041	0,8408	0,166	0,6880
	maltose	243,846	<,0001*	9,289	0,0048*	1,939	0,1614	43,254	<,0001*	0,039	0,8454	0,131	0,8776	2,105	0,1623	0,284	0,5998	0,001	0,9812
	b-gentibiose	238,163	<,0001*	6,232	0,0183*	1,840	0,1763	88,746	<,0001*	1,754	0,1954	2,444	0,1039	8,275	0,0093*	2,412	0,1361	1,072	0,3129
	maltitol	91,053	<,0001*	5,602	0,0246*	1,723	0,1957	40,974	<,0001*	0,039	0,8456	0,699	0,5049	22,483	0,0001*	6,338	0,0205*	12,566	0,0020*
	tetradecanoic acid	1102,260	<,0001*	0,045	0,8338	0,853	0,4360	17,259	<,0001*	6,407	0,0168*	1,666	0,2059	17,387	0,0005*	2,533	0,1271	0,897	0,3549
	hexadecanoic acid	14,966	<,0001*	15,489	0,0005*	15,083	<,0001*	4,150	0,0256*	0,649	0,4269	2,045	0,1470	22,080	0,0001*	0,049	0,8271	0,028	0,8682
	cis,cis-9,12-octadecadienoic acid	4,785	0,0157*	0,746	0,3948	0,799	0,4590	28,007	<,0001*	0,478	0,4948	1,511	0,2369	53,035	<,0001*	1,399	0,2507	1,072	0,3128
	cis-9-octadecenoic acid	1,027	0,3704	0,016	0,9016	1,565	0,2257	59,664	<,0001*	2,825	0,1032	2,243	0,1237	7,679	0,0118*	0,605	0,4457	1,296	0,2683
	cis,cis,cis-9,12,15-octadecatrienoic	4,974	0,0136*	2,601	0,1173	0,062	0,9400	37,092	<,0001*	0,000	0,9961	1,496	0,2403	3,375	0,0811	0,184	0,6723	0,235	0,6334
	octadecanoic acid	11,166	0,0002*	1,098	0,3031	1,638	0,2113	1,442	0,2525	2,486	0,1253	0,254	0,7775	15,981	0,0007*	0,074	0,7884	0,343	0,5647
	docosanoic acid	2604,940	<,0001*	0,148	0,7028	0,352	0,7063	8,509	0,0012*	0,008	0,9279	0,913	0,4120	24,504	<,0001*	0,247	0,6245	0,384	0,5423
	cis-13-docosenoic acid	2,176	0,1311	0,464	0,5011	0,003	0,9968	19,348	<,0001*	0,057	0,8135	0,305	0,7392	19,993	0,0002*	0,003	0,9537	0,115	0,7378
	b-tocopherol	3,708	0,0364*	0,027	0,8703	0,345	0,7112	187,505	<,0001*	1,499	0,2304	1,499	0,2397	12913,205	<,0001*	0,913	0,3507	0,913	0,3507
	g-tocopherol	94,515	<,0001*	45,826	<,0001*	82,617	<,0001*	853,387	<,0001*	4,751	0,0373*	4,751	0,0161*	20612,699	<,0001*	0,024	0,8791	0,024	0,8791
	1-octacosanol	66,755	<,0001*	1,078	0,3074	0,329	0,7219	0,930	0,4055	0,001	0,9812	1,446	0,2514	1,210	0,2843	0,000	0,9954	0,041	0,8410
	a-tocopherol	191,180	<,0001*	0,437	0,5136	0,120	0,8874	22,157	<,0001*	0,359	0,5533	1,088	0,3497	2,904	0,1038	0,005	0,9470	0,018	0,8941
	campsterol	204,008	<,0001*	0,768	0,3879	3,875	0,0319*	13,519	<,0001*	1,247	0,2729	0,161	0,8520	32,874	<,0001*	0,305	0,5867	0,444	0,5128
	stigmasterol	16,549	<,0001*	2,381	0,1333	1,309	0,2852	61,082	<,0001*	0,500	0,4851	0,473	0,6280	18,743	0,0003*	0,004	0,9473	1,254	0,2760
	b-sitosterol	146,715	<,0001*	0,027	0,8702	1,416	0,2584	1,564	0,2259	0,005	0,9469	0,686	0,5113	10,620	0,0039*	0,052	0,8214	0,164	0,6901
	fucosterol	4586,451	<,0001*	4586,451	<,0001*	4586,451	<,0001*	51,747	<,0001*	1,504	0,2295	1,209	0,3125	1165,078	<,0001*	0,581	0,4548	0,581	0,4548
	* significant at p<,0001
